# Supplementary material
Source: Springer Nature journal article supplement (https://www.springermedizin.de/resource/supplementary/12913_2008_1049_MOESM5_ESM.pdf/9536216)

## Survey 1 First actions of callers

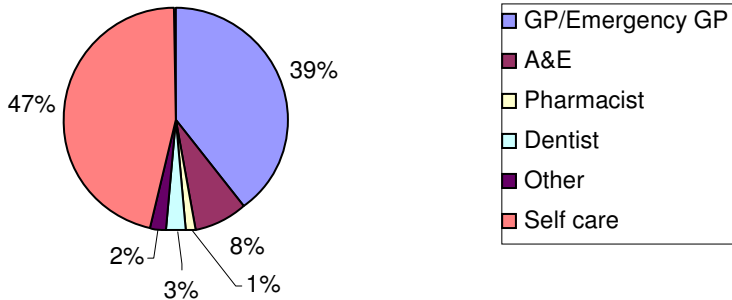

## Survey 2 First actions of callers

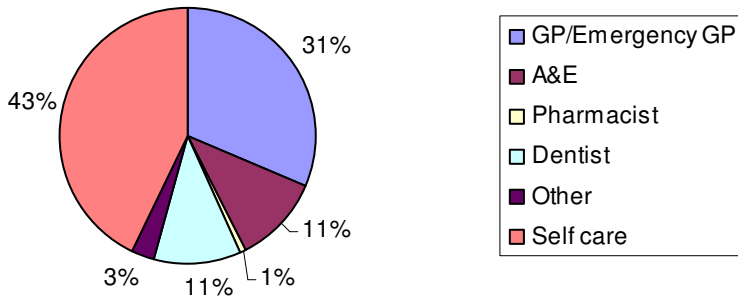

Supplement: MOESM5 [file 9536216]
